# Supplementary material for: Effect of Pd(ii) uptake on high-temperature phase transitions in a hybrid organic–inorganic perovskite semiconductor
Source: Royal Society of Chemistry journal article supplement (doi:10.1039/d2dt03526j), 2023-01-01
Supplement: d2dt03526j1.pdf [file d2dt03526j1.pdf]

## Supporting Information

### Effect of Pd(II) Uptake on High-Temperature Phase Transitions in a Hybrid Organic-Inorganic Perovskite Semiconductor

Yan Xu, Ke Xu, Lei He, Jie Mu, Ti-Jian Yin, Jin-Tao Men and Qiong Ye\*

#### Characterizations and Methods

**Phase Purity.** The powder X-ray diffraction (PXRD) analysis of **1** and **1-Pd** were performed on Rigaku Ultima IV multipurpose X-ray Diffractometer at 293 K. The diffraction pattern is obtained in the range of  $2\theta$  ( $5 \sim 50^\circ$ ) with a step size of  $0.02^\circ$ .

**Single-Crystal X-ray Diffraction (SCXRD).** The single-crystal X-ray diffraction of **1** at 300, 377 and 416 K were obtained on Rigaku Saturn 924 diffractometer with Mo  $K\alpha$  radiation ( $\lambda = 0.71073 \text{ \AA}$ ). The data were processed with the CrystalClear software package. The structures of **1** were solved by direct methods and refined with the SHELXTL software package which used full-matrix least-squares methods based on  $F^2$  data. The anisotropic refinement of all non-H atoms was performed, and the positions of all H atoms were geometrically generated. The crystallographic data and the details of structure refinement are listed in **Table S1**.

**DSC Measurements.** Differential scanning calorimetry (DSC) of **1** and **1-Pd** were measured on PerkinElmer Diamond DSC instrument that 15.2 mg (**1**) and 12.4 mg (**1-Pd**) powder samples were placed in aluminum crucibles with heating and cooling rates of 20 K/min under nitrogen atmosphere.

**Dielectric Measurements.** The dielectric responses of **1** and **1-Pd** were performed on Tonghui Model TH2828A impedance analyzer. The powder-pressed pellets of about 2-3 mm pasted with silver or carbon conducting glue were used in dielectric

measurements. The temperature-dependent dielectric constants were measured on a Tonghui Model TH2828A impedance analyzer at the frequencies of 1 MHz, with an applied ac voltage at 1 V. During the experiment, the heating process is completed by heating furnace, and the cooling is completed by liquid nitrogen.

**Ultraviolet–visible (UV-vis) Absorption Spectrum.** At room temperature, the UV–vis diffuse reflectance spectrum of **1** was measured on Shimadzu (Tokyo, Japan) UV–2600 spectrophotometer. BaSO<sub>4</sub> was selected as the standard (100%) reflectivity reference.

**Elemental Analysis.** For the elemental analysis, the regular elemental analysis was determined with Elementar vario EL III instrument. Inductively coupled plasma (ICP) elemental analysis was performed on Spectroblue ICP-OES.

### Conductivity Measurements

At different pressures, the electrical conductivity of compounds **1** and **1-Pd** were measured on a four-terminal powder resistivity tester at room temperature.

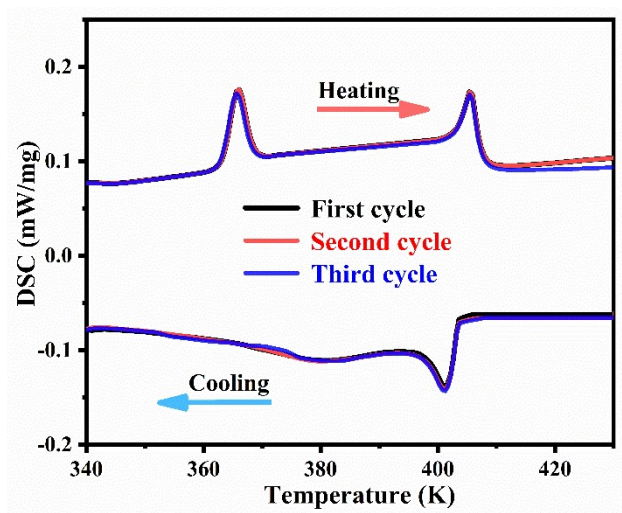

**Figure S1.** DSC curves of compound **1** during multiple rounds of heating and cooling.

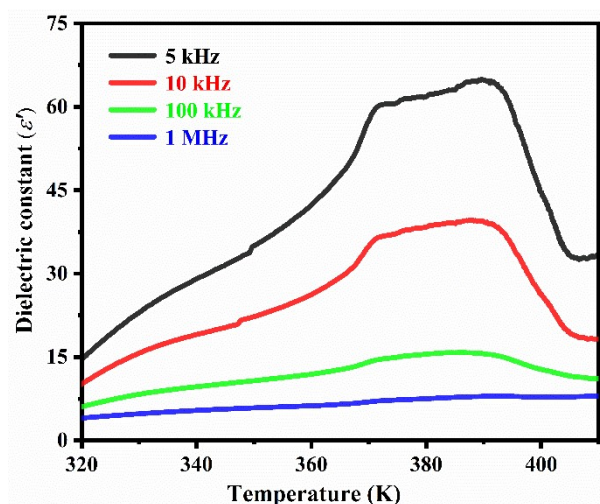

**Figure S2.** Temperature dependence of the real part ( $\epsilon'$ ) of compound **1** during the heating at different frequencies.

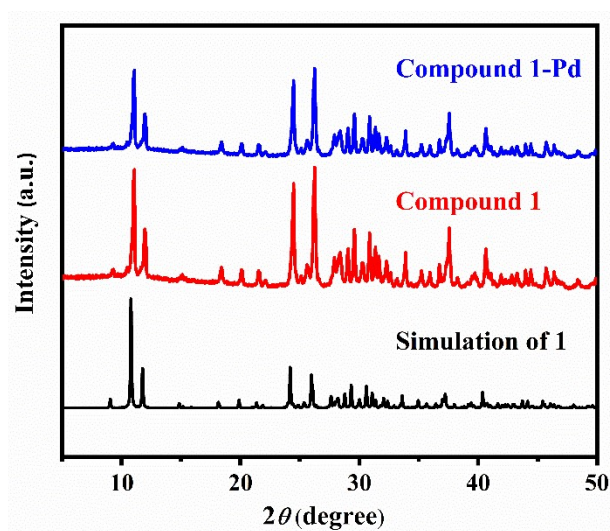

**Figure S3.** The powder X-ray diffraction patterns of compounds **1** and **1-Pd** at 293 K.

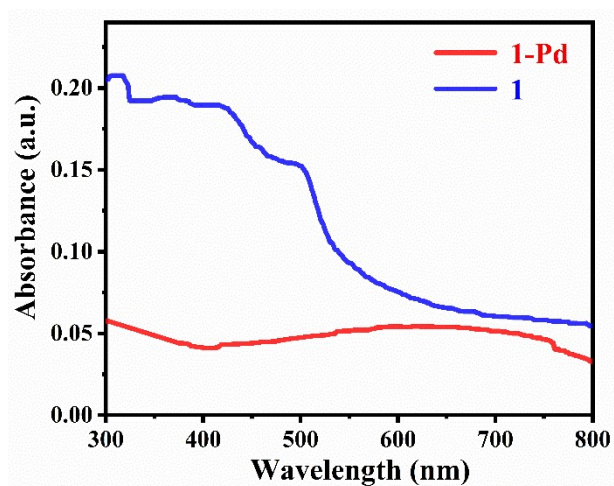

**Figure S4.** UV-vis absorption spectrum for **1** and **1-Pd**.

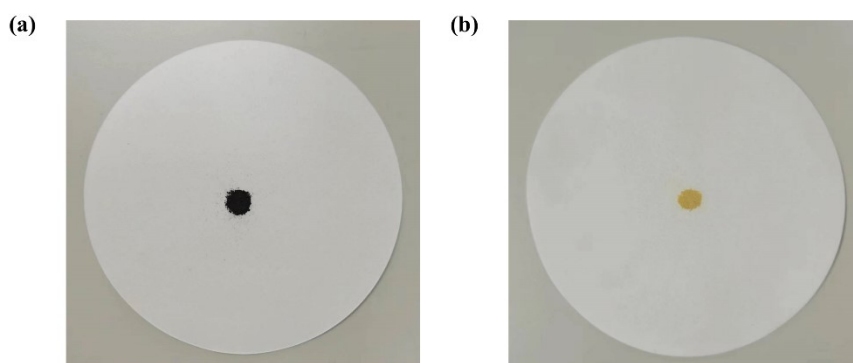

**Figure S5.** Comparison graphs before and after desorption: (a) before desorption; (b) after desorption.

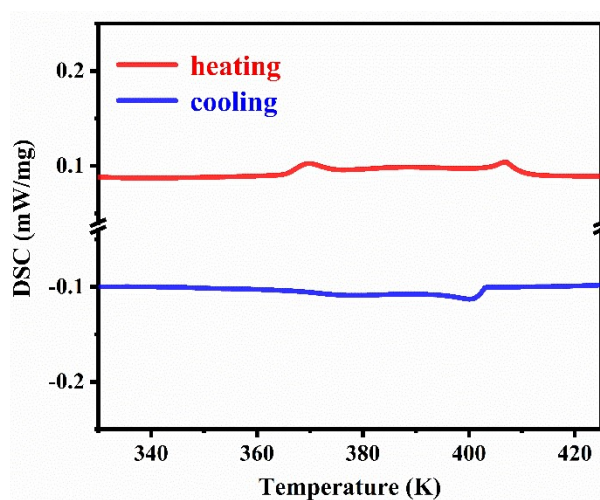

**Figure S6.** DSC curves of the powder after desorption during the cooling and heating cycles.

**Table S1.** Crystal data and structure refinement details of **1**.

| Chemical Formula         | [C <sub>3</sub> H <sub>7</sub> N <sub>2</sub> S]PbI <sub>3</sub> |              |              |
|--------------------------|------------------------------------------------------------------|--------------|--------------|
| <i>T</i> (K)             | 300 K                                                            | 377 K        | 416 K        |
| Formula weight           | 691.06                                                           | 691.06       | 1382.13      |
| Crystal system           | Orthorhombic                                                     | Orthorhombic | Orthorhombic |
| Space group              | <i>Pbca</i>                                                      | <i>Pmcn</i>  | <i>Cmcm</i>  |
| <i>a</i> /Å              | 15.0602 (7)                                                      | 8.7522 (15)  | 8.9920 (14)  |
| <i>b</i> /Å              | 8.3101 (3)                                                       | 17.620 (2)   | 17.951 (4)   |
| <i>c</i> /Å              | 19.5118 (8)                                                      | 8.2301 (11)  | 8.1262 (11)  |
| $\alpha$ (deg)           | 90                                                               | 90           | 90           |
| $\beta$ (deg)            | 90                                                               | 90           | 90           |
| $\gamma$ (deg)           | 90                                                               | 90           | 90           |
| <i>V</i> /Å <sup>3</sup> | 2441.94 (18)                                                     | 1269.2 (3)   | 1311.7 (4)   |
| <i>Z</i>                 | 8                                                                | 4            | 2            |
| <i>F</i> (000)           | 2368.0                                                           | 1184.0       | 1184.0       |
| GOF                      | 0.977                                                            | 1.0120       | 1.093        |
| <i>R</i> <sub>1</sub>    | 0.0664 (2336)                                                    | 0.0803       | 0.0872 (374) |
| <i>wR</i> <sub>2</sub>   | 0.1830 (3156)                                                    | 0.1844       | 0.2945 (567) |

**Table S2.** After a complete round of structural transitions of compound **1**, the structure of **1** after returning to room temperature is the same as the structure at room temperature at the beginning.

| <i>T</i> (K) | <i>a</i> /Å | <i>b</i> /Å | <i>c</i> /Å | <i>V</i> /Å <sup>3</sup> | Space group | Space group number |
|--------------|-------------|-------------|-------------|--------------------------|-------------|--------------------|
| 300 K        | 15.0602     | 8.3101      | 19.5118     | 2441.94(18)              | <i>Pbca</i> | 61                 |
| 377 K        | 8.2363      | 8.7565      | 17.6090     | 1269.98(19)              | <i>Pnma</i> | 62                 |
| 416 K        | 8.9920      | 17.9510     | 8.1262      | 1311.70(4)               | <i>Cmcm</i> | 63                 |
| 395 K        | 8.1651      | 8.8332      | 17.8750     | 1289.20(2)               | <i>Pnma</i> | 62                 |
| 390 K        | 8.1862      | 8.8032      | 17.8050     | 1283.10(2)               | <i>Pnma</i> | 62                 |

|       |         |        |         |             |             |    |
|-------|---------|--------|---------|-------------|-------------|----|
| 385 K | 8.2042  | 8.7954 | 17.7423 | 1280.30(3)  | <i>Pnma</i> | 62 |
| 380 K | 8.2237  | 8.7698 | 17.6353 | 1271.90(2)  | <i>Pnma</i> | 62 |
| 375 K | 8.2362  | 8.7467 | 17.6096 | 1268.59(19) | <i>Pnma</i> | 62 |
| 370 K | 8.2450  | 8.7228 | 17.5483 | 1262.05(18) | <i>Pnma</i> | 62 |
| 300 K | 15.0824 | 8.3078 | 19.5158 | 2445.40(2)  | <i>Pbca</i> | 61 |

**Table S3.** The bond lengths and angles at 300 K.

| Bond lengths (Å)    |            | Bond angles (°)                      |             |
|---------------------|------------|--------------------------------------|-------------|
| Pb1—I1              | 3.1703 (8) | I1—Pb1—I1 <sup>i</sup>               | 92.43 (3)   |
| Pb1—I1 <sup>i</sup> | 3.2429 (8) | I1 <sup>i</sup> —Pb1—I2 <sup>i</sup> | 84.14 (2)   |
| Pb1—I2 <sup>i</sup> | 3.3049 (8) | I1—Pb1—I2                            | 86.80 (2)   |
| Pb1—I2              | 3.2154 (8) | I1—Pb1—I2 <sup>i</sup>               | 106.21 (2)  |
| Pb1—I3              | 3.2323 (8) | I1—Pb1—I3                            | 86.72 (2)   |
| Pb1—I3 <sup>i</sup> | 3.3042 (8) | I1—Pb1—I3 <sup>i</sup>               | 174.77 (3)  |
| S1—C3               | 1.799 (14) | I1 <sup>i</sup> —Pb1—I3 <sup>i</sup> | 84.35 (2)   |
| S1—C1               | 1.694 (14) | I2—Pb1—I1 <sup>i</sup>               | 104.25 (2)  |
| N2—C1               | 1.295 (16) | I2—Pb1—I2 <sup>i</sup>               | 164.41 (4)  |
| N2—C2               | 1.44 (2)   | I2—Pb1—I3 <sup>i</sup>               | 89.99 (2)   |
| C3—C2               | 1.468 (19) | I2—Pb1—I3                            | 79.94 (2)   |
| C1—N1               | 1.331 (13) | I3—Pb1—I1 <sup>i</sup>               | 175.68 (3)  |
|                     |            | I3—Pb1—I2 <sup>i</sup>               | 92.02 (2)   |
|                     |            | I3 <sup>i</sup> —Pb1—I2 <sup>i</sup> | 77.62 (2)   |
|                     |            | I3—Pb1—I3 <sup>i</sup>               | 96.79 (3)   |
|                     |            | Pb1—I1—Pb1 <sup>ii</sup>             | 80.761 (19) |
|                     |            | Pb1—I2—Pb1 <sup>ii</sup>             | 79.167 (18) |
|                     |            | Pb1—I3—Pb1 <sup>ii</sup>             | 78.937 (19) |
|                     |            | C1—S1—C3                             | 91.4 (5)    |
|                     |            | C1—N2—C2                             | 115.3 (12)  |
|                     |            | C2—C3—S1                             | 108.1 (10)  |

|          |            |
|----------|------------|
| N2—C1—S1 | 115.5 (9)  |
| N2—C1—N1 | 123.8 (14) |
| N1—C1—S1 | 120.7 (11) |
| N2—C2—C3 | 109.7 (12) |

**Table S4.** The bond lengths and angles at 377 K.

| Bond lengths (Å)      |             | Bond angles (°)                         |            |
|-----------------------|-------------|-----------------------------------------|------------|
| Pb1—I1 <sup>i</sup>   | 3.2479 (13) | I1—Pb1—I1 <sup>i</sup>                  | 80.47 (5)  |
| Pb1—I1 <sup>ii</sup>  | 3.2606 (13) | I1 <sup>iii</sup> —Pb1—I1 <sup>i</sup>  | 179.14 (3) |
| Pb1—I1                | 3.2479 (13) | I1—Pb1—I1 <sup>ii</sup>                 | 179.14 (3) |
| Pb1—I1 <sup>iii</sup> | 3.2606 (13) | I1 <sup>iii</sup> —Pb1—I1 <sup>ii</sup> | 80.09 (5)  |
| Pb1—I2                | 3.1851 (16) | I2 <sup>ii</sup> —Pb1—I1 <sup>i</sup>   | 94.01 (3)  |
| Pb1—I2 <sup>ii</sup>  | 3.2449 (16) | I2—Pb1—I1 <sup>ii</sup>                 | 94.52 (3)  |
| S1—C3                 | 1.74 (3)    | I2—Pb1—I1 <sup>iii</sup>                | 94.52 (3)  |
| S1—C1                 | 1.70 (4)    | I2 <sup>ii</sup> —Pb1—I1 <sup>ii</sup>  | 85.14 (3)  |
| C3—C2                 | 1.45 (4)    | I2 <sup>ii</sup> —Pb1—I1                | 94.01 (3)  |
| N2—C2                 | 1.35 (4)    | I2—Pb1—I1 <sup>i</sup>                  | 86.32 (3)  |
| N2—C1                 | 1.38 (4)    | I2 <sup>ii</sup> —Pb1—I1 <sup>iii</sup> | 85.14 (3)  |
|                       |             | I2—Pb1—I1                               | 86.32 (3)  |
|                       |             | C1—S1—C3                                | 90.3 (13)  |
|                       |             | C1—N2—C2                                | 108 (3)    |
|                       |             | N2—C2—C3                                | 117 (3)    |
|                       |             | C2—C3—S1                                | 107 (2)    |
|                       |             | N2—C1—S1                                | 117 (2)    |
|                       |             | N1—C1—S1                                | 115 (2)    |
|                       |             | N1—C1—N2                                | 128 (3)    |

**Table S5.** The bond lengths and angles at 416 K.

| <b>Bond lengths (Å)</b> |             | <b>Bond angles (°)</b>   |           |
|-------------------------|-------------|--------------------------|-----------|
| Pb1—I1                  | 3.247 (2)   | I2—Pb1—I1                | 85.20 (7) |
| Pb1—I1 <sup>i</sup>     | 3.247 (2)   | I2 <sup>ii</sup> —Pb1—I1 | 94.80 (7) |
| Pb1—I1 <sup>ii</sup>    | 3.247 (2)   | I2 <sup>ii</sup> —Pb1—I2 | 180       |
| Pb1—I1 <sup>iii</sup>   | 3.247 (2)   | C1—S1—C3                 | 101.5 (6) |
| Pb1—I2 <sup>ii</sup>    | 3.205 (3)   | C1—N2—H2                 | 124.1     |
| Pb1—I2                  | 3.205 (3)   | C1—N2—C2                 | 111.7 (8) |
| S1—C1                   | 1.5777 (11) | C2—N2—H2                 | 124.1     |
| S1—C3                   | 1.5780 (11) | N2—C1—S1                 | 107.5 (7) |
| N2—C1                   | 1.394 (10)  | N1—C1—S1                 | 125 (2)   |
| N2—C2                   | 1.410 (10)  | N1—C1—N2                 | 128 (2)   |
| C1—N1                   | 1.298 (10)  | C2—C3—S1                 | 107.5 (7) |
| C3—C2                   | 1.394 (10)  | C3—C2—N2                 | 111.8 (8) |

**Table S6.** The torsion angles [°] for **1** at 300 K.

| <b>Bond angles (°)</b> | <b>300 K</b> |
|------------------------|--------------|
| S1—C3—C2—N2            | 3.5 (19)     |
| C3—S1—C1—N2            | 0.0 (14)     |
| C3—S1—C1—N1            | -176.9 (15)  |
| C1—S1—C3—C2            | -2.1 (13)    |
| C1—N2—C2—C3            | -4 (2)       |
| C2—N2—C1—S1            | 2 (2)        |
| C2—N2—C1—N1            | 179.0 (17)   |

**Table S7.** The torsion angles [°] for **1** at 377 K.

| <b>Bond angles (°)</b> | <b>377 K</b> |
|------------------------|--------------|
|------------------------|--------------|



|             |      |
|-------------|------|
| S1—C3—C2—N2 | -0.0 |
| S1—C1—N2—C2 | -0.0 |
| C3—C2—N2—C1 | 0.0  |

**Table S8.** The torsion angles [°] for **1** at 416 K.

| Bond angles (°) | 416 K      |
|-----------------|------------|
| S1—C3—C2—N2     | 0.00 (3)   |
| C1—S1—C3—C2     | 0.000 (17) |
| C1—N2—C2—C3     | 0.00 (3)   |
| C3—S1—C1—N2     | 0.000 (13) |
| C3—S1—C1—N1     | 180.00 (2) |
| C2—N2—C1—S1     | 0.00 (3)   |
| C2—N2—C1—N1     | 180.00 (3) |
